# Supplementary material
Source: MDPI journal article supplement (https://www.mdpi.com/2079-9284/10/2/38)
Supplement: s1 [file s1]

# Low-Molecular-Weight Gels as Smart Materials for the Enhancement of Antioxidants Activity

Aneta Toronyi\*<sup>1</sup>, Demetra Giuri\*<sup>2</sup>, Silvia Martiniaková<sup>1</sup>, Claudia Tomasini<sup>2</sup>

<sup>1</sup>*Slovak University of Technology in Bratislava, Faculty of Chemical and Food Technology, Institute of Food Science and Nutrition, Department of Food Technology, Radlinského 9, 812 37 Bratislava, Slovakia*

<sup>2</sup>*Università di Bologna, Dipartimento di Chimica Giacomo Ciamician, Via Selmi 2, 40126 Bologna, Italy*

## Table of Contents

|                                                                                                                                                                                         |    |
|-----------------------------------------------------------------------------------------------------------------------------------------------------------------------------------------|----|
| <b>Table S1:</b> Composition of LMW gels with $\alpha$ -tocopherol                                                                                                                      | S3 |
| <b>Figure S1:</b> Gels of Boc-L-Dopa(Bn) <sub>2</sub> -OH with $\alpha$ -tocopherol                                                                                                     | S4 |
| <b>Figure S2.</b> Time sweep analysis of the gel of Boc-L-Dopa(Bn) <sub>2</sub> -OH 0.8% w/v (DMSO/H <sub>2</sub> O 70/30) with 5 $\mu$ M concentration of $\alpha$ -tocopherol         | S5 |
| <b>Figure S3:</b> Amplitude sweep of gels 0.8% w/v of Boc-L-DOPA(Bn) <sub>2</sub> -OH in DMSO:H <sub>2</sub> O = 7:3 with incorporated $\alpha$ -tocopherol in a specific concentration | S6 |
| <b>Figure S4:</b> Optical microscope images of gels (0.8% w/v) of Boc-L-DOPA(Bn) <sub>2</sub> -OH in DMSO:H <sub>2</sub> O = 7:3 with incorporated of $\alpha$ -tocopherol              | S6 |
| <b>Figure S5:</b> 2, 2-diphenyl-1-picrylhydrazyl (DPPH) reaction mechanism                                                                                                              | S7 |
| <b>Table S2:</b> Composition of LMW gels with postbiotics (PB)                                                                                                                          | S8 |
| <b>Figure S6:</b> Gels of Boc-L-Dopa(Bn) <sub>2</sub> -OH with postbiotics                                                                                                              | S8 |

|                                                                                                                                                      |     |
|------------------------------------------------------------------------------------------------------------------------------------------------------|-----|
| <b>Figure S7.</b> Time sweep analysis of the gel of Boc-L-Dopa(Bn) <sub>2</sub> -OH 0.5% w/v with 30% of Repair complex                              | S9  |
| <b>Figure S8.</b> Time sweep analysis of the gel of Boc-L-Dopa(Bn) <sub>2</sub> -OH 0.5% w/v with 30% of ProRenew complex                            | S9  |
| <b>Figure S9:</b> Optical microscope images showing gel fibers when postbiotics ProRenew Complex or Repair Complex is used to trigger gelation       | S10 |
| <b>Figure S10:</b> Amplitude sweep of gels 0.5% of Boc-L-DOPA(Bn) <sub>2</sub> -OH in DMSO:Postbiotics (Repair Complex) in specific concentrations   | S11 |
| <b>Figure S11:</b> Amplitude sweep of gels 0.5% of Boc-L-DOPA(Bn) <sub>2</sub> -OH in DMSO:Postbiotics (ProRenew Complex) in specific concentrations | S11 |

**Table S1:** Composition of LMW gels with  $\alpha$ -tocopherol.

| Gelator [%] | $\alpha$ -tocopherol [ $\mu$ M] | $\alpha$ -tocopherol (1mM) [mL] | DMSO [mL] | H <sub>2</sub> O [mL] | Tot V [mL] |
|-------------|---------------------------------|---------------------------------|-----------|-----------------------|------------|
| <b>0.8</b>  | 5                               | 0.005                           | 0.695     | 0.3                   | 1          |
|             | 10                              | 0.010                           | 0.690     |                       |            |
|             | 15                              | 0.015                           | 0.685     |                       |            |
|             | 20                              | 0.020                           | 0.680     |                       |            |
|             | 40                              | 0.040                           | 0.660     |                       |            |
|             | 60                              | 0.060                           | 0.640     |                       |            |
|             | 100                             | 0.100                           | 0.600     |                       |            |
| <b>0.8</b>  | 5                               | 0.005                           | 0.795     | 0.2                   | 1          |
|             | 10                              | 0.010                           | 0.790     |                       |            |
|             | 15                              | 0.015                           | 0.785     |                       |            |
|             | 20                              | 0.020                           | 0.780     |                       |            |
|             | 40                              | 0.040                           | 0.760     |                       |            |
|             | 60                              | 0.060                           | 0.740     |                       |            |
|             | 100                             | 0.100                           | 0.700     |                       |            |
| <b>0.8</b>  | 5                               | 0.005                           | 0.495     | 0.5                   | 1          |
|             | 10                              | 0.010                           | 0.490     |                       |            |
|             | 15                              | 0.015                           | 0.485     |                       |            |
|             | 20                              | 0.020                           | 0.480     |                       |            |
|             | 40                              | 0.040                           | 0.460     |                       |            |
|             | 60                              | 0.060                           | 0.440     |                       |            |
|             | 100                             | 0.100                           | 0.400     |                       |            |
| <b>1.0</b>  | 5                               | 0.005                           | 0.695     | 0.3                   | 1          |
|             | 10                              | 0.010                           | 0.690     |                       |            |
|             | 15                              | 0.015                           | 0.685     |                       |            |
|             | 20                              | 0.020                           | 0.680     |                       |            |
|             | 40                              | 0.040                           | 0.660     |                       |            |
|             | 60                              | 0.060                           | 0.640     |                       |            |
|             | 100                             | 0.100                           | 0.600     |                       |            |
| <b>1.0</b>  | 5                               | 0.005                           | 0.795     | 0.2                   | 1          |
|             | 10                              | 0.010                           | 0.790     |                       |            |
|             | 15                              | 0.015                           | 0.785     |                       |            |
|             | 20                              | 0.020                           | 0.780     |                       |            |
|             | 40                              | 0.040                           | 0.760     |                       |            |
|             | 60                              | 0.060                           | 0.740     |                       |            |
|             | 100                             | 0.100                           | 0.700     |                       |            |
| <b>1.0</b>  | 5                               | 0.005                           | 0.495     | 0.5                   | 1          |
|             | 10                              | 0.010                           | 0.490     |                       |            |
|             | 15                              | 0.015                           | 0.485     |                       |            |
|             | 20                              | 0.020                           | 0.480     |                       |            |
|             | 40                              | 0.040                           | 0.460     |                       |            |
|             | 60                              | 0.060                           | 0.440     |                       |            |
|             | 100                             | 0.100                           | 0.400     |                       |            |

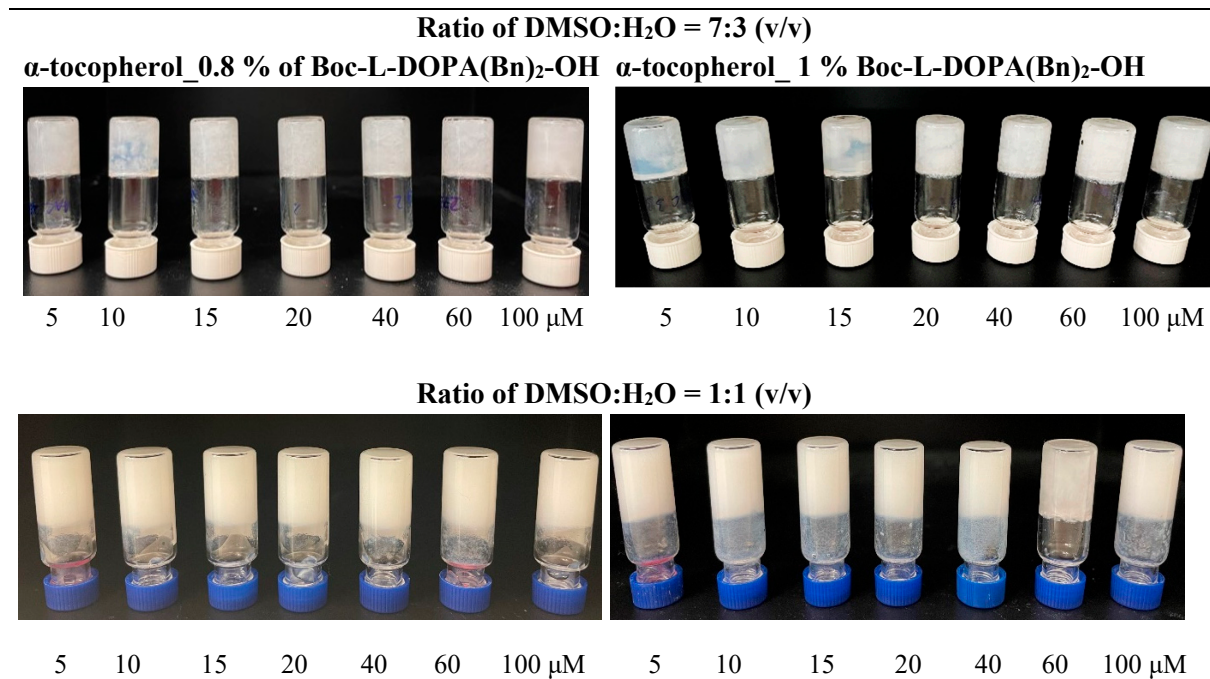

**Figure S1:** Gels of Boc-L-Dopa(Bn)<sub>2</sub>-OH with α-tocopherol.

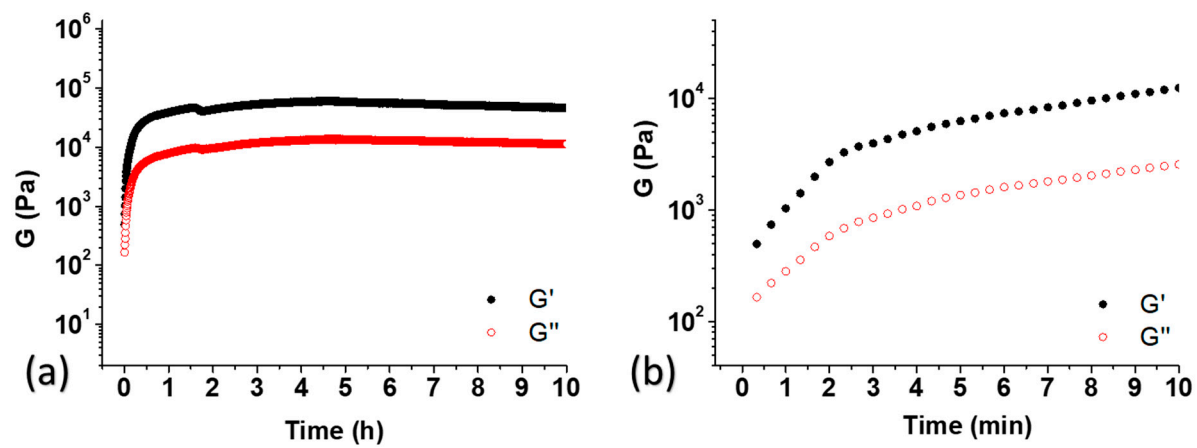

**Figure S2.** Time sweep analysis of the gel of Boc-L-Dopa(Bn)<sub>2</sub>-OH 0.8% w/v (DMSO/H<sub>2</sub>O 70/30) with 5  $\mu$ M concentration of  $\alpha$ -tocopherol.

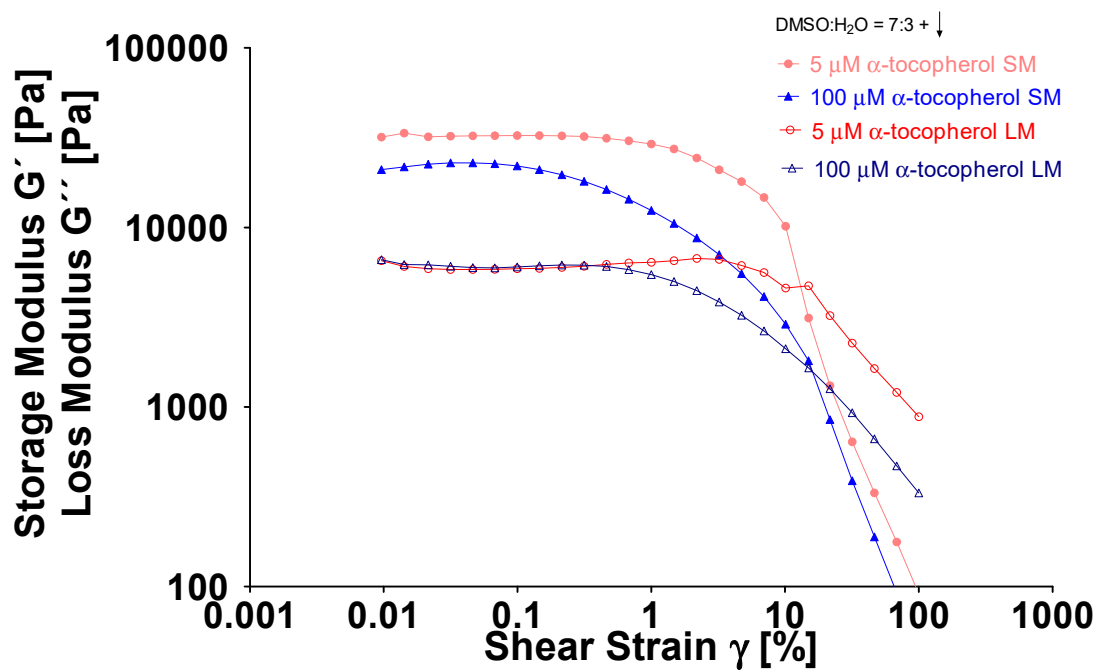

**Figure S3:** Amplitude sweeps of gels (0.8% w/v) of Boc-L-DOPA(Bn)<sub>2</sub>-OH in DMSO:H<sub>2</sub>O = 7:3 with incorporated α-tocopherol in a specific concentration.

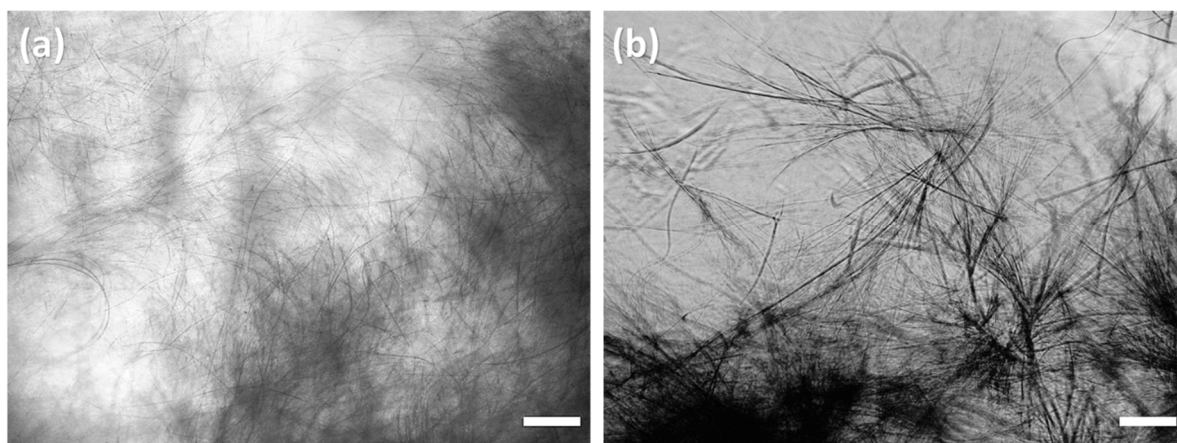

**Figure S4:** Optical microscope images of gels (0.8% w/v) of Boc-L-DOPA(Bn)<sub>2</sub>-OH in DMSO:H<sub>2</sub>O = 7:3 with incorporated (a) 5 μM or (b) 100 μM of α-tocopherol. Scalebar = 100 μm.

Chemical reactions:

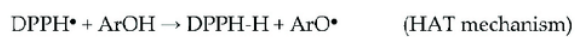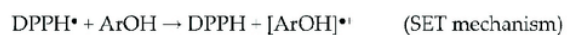

where ArOH: phenolic AO

Mechanism of reaction: HAT

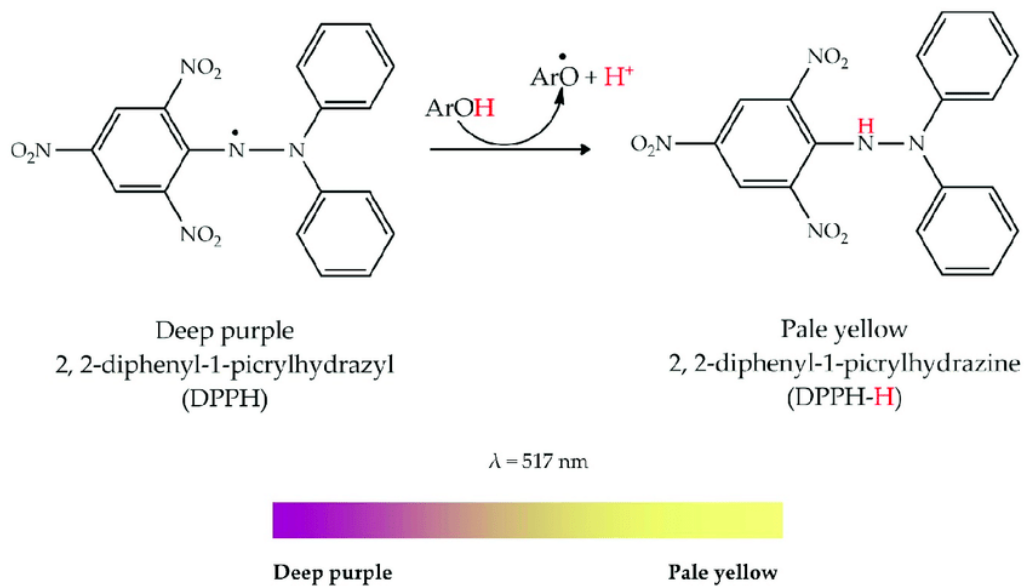

**Figure S5:** 2, 2-diphenyl-1-picrylhydrazyl (DPPH) reaction mechanism.

**Table S2:** Composition of LMW gels with postbiotics (PB).

| Gelator [% w/v] | PB [% v/v] | DMSO [mL] | PB [mL] | H <sub>2</sub> O [mL] | Total V [mL] |
|-----------------|------------|-----------|---------|-----------------------|--------------|
| 0.5             | 30         | 0.5       | 0.3     | 0.2                   | 1            |
| 0.5             | 50         | 0.5       | 0.5     | -                     | 1            |
| 0.5             | 60         | 0.4       | 0.6     | -                     | 1            |
| 0.5             | 70         | 0.3       | 0.7     | -                     | 1            |
| 0.5             | 80         | 0.2       | 0.8     | -                     | 1            |

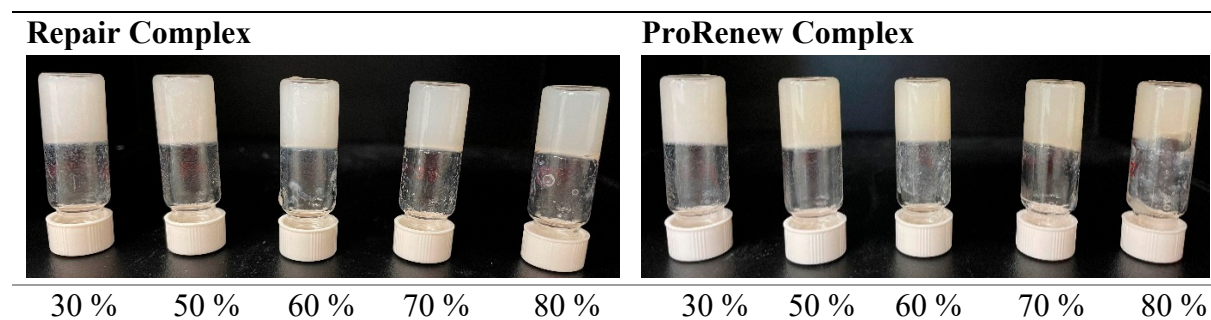

**Figure S6.** Gels of Boc-L-Dopa(Bn)<sub>2</sub>-OH with postbiotics.



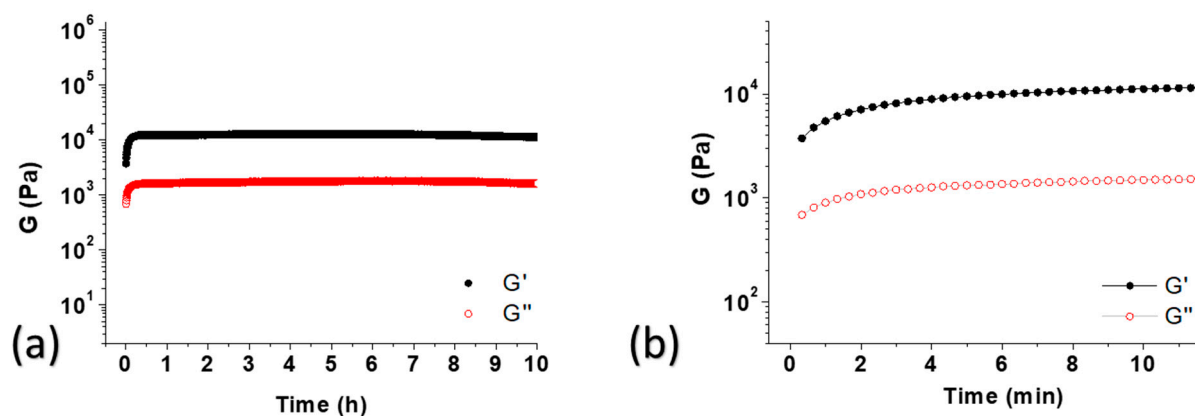

**Figure S7.** Time sweep analysis of the gel of Boc-L-Dopa(Bn)<sub>2</sub>-OH 0.5% w/v with 30% of Repair complex over 10 h (a) and over 10 minutes (b).

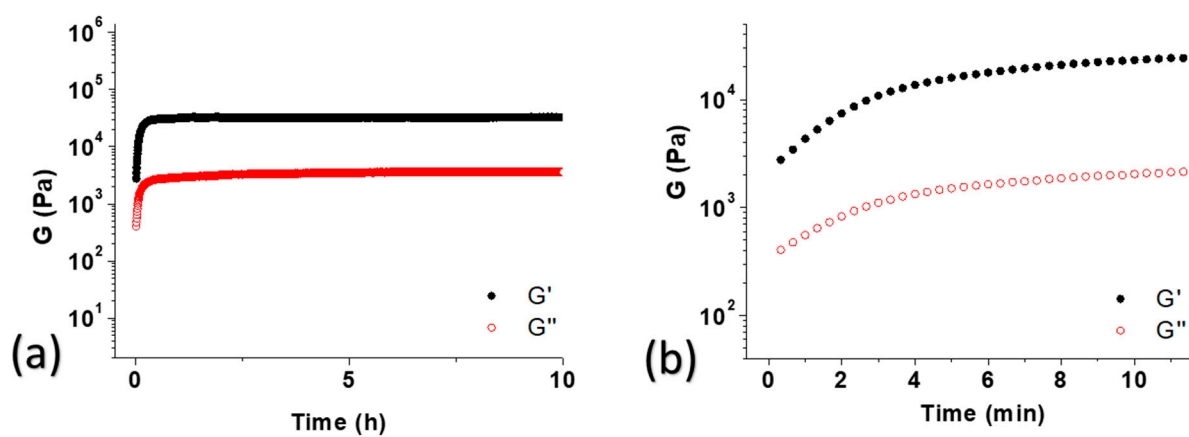

**Figure S8.** Time sweep analysis of the gel of Boc-L-Dopa(Bn)<sub>2</sub>-OH 0.5% w/v with 30% of ProRenew complex over 10 h (a) and over 10 minutes (b).

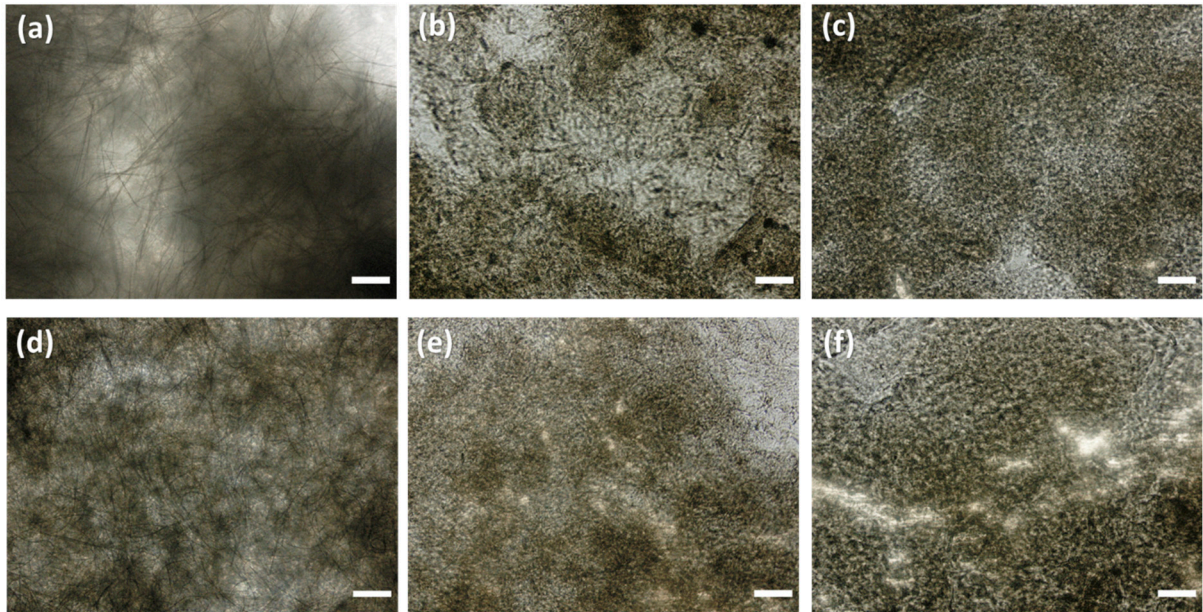

**Figure S9.** Optical microscope images showing gel fibers when postbiotics ProRenew Complex (a, b, c) or Repair Complex (d, e, f) is used to trigger gelation. a/d: gels with 30% of PBs; b/e: gels with 60% of PBs; c/f: gels with 80% of PBs; scalebar = 100  $\mu\text{m}$ .

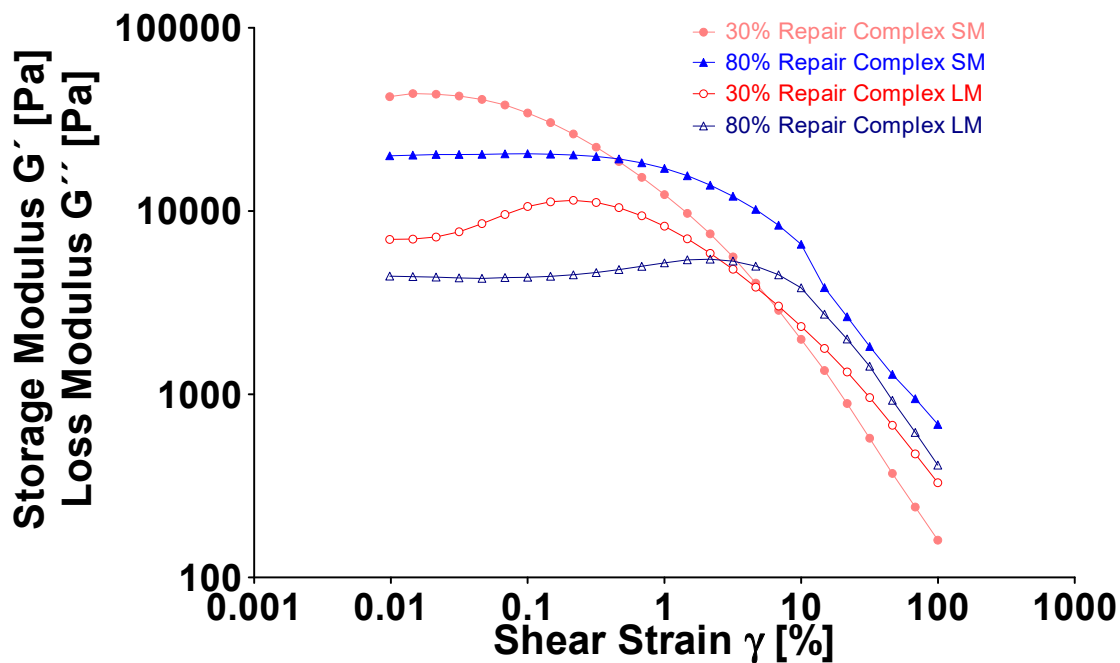

Figure S10: Amplitude sweep of gels 0.5% of Boc-L-DOPA(Bn)<sub>2</sub>-OH in DMSO:Postbiotics (Repair Complex) in specific concentrations.

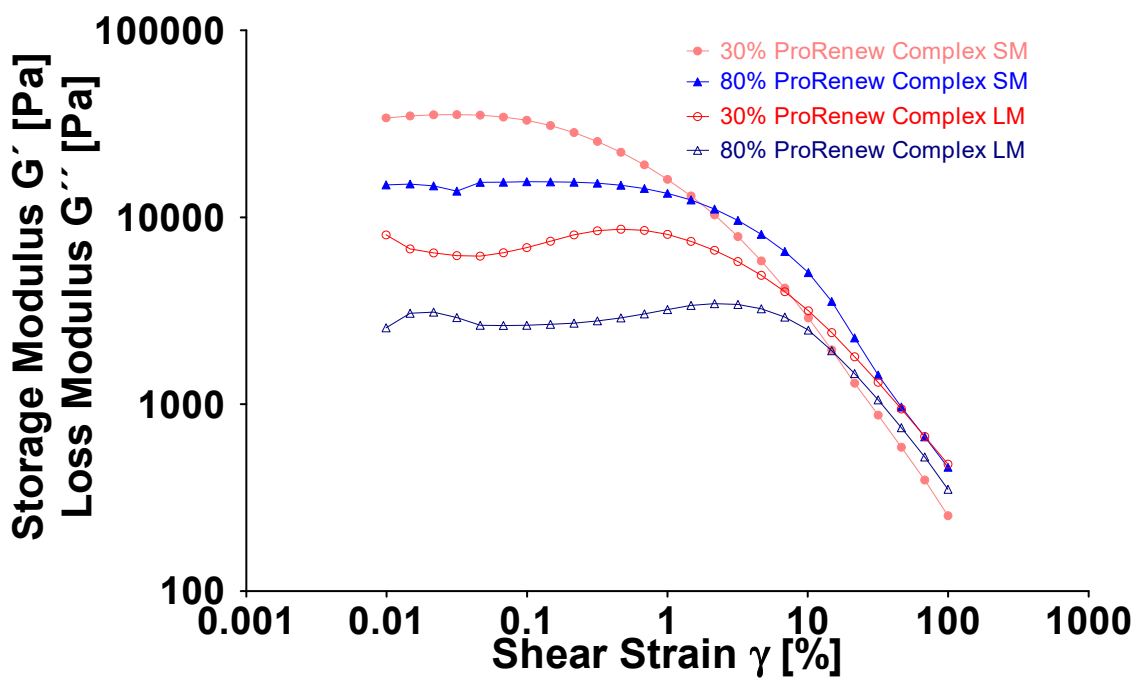

Figure S11: Amplitude sweep of gels 0.5% of Boc-L-DOPA(Bn)<sub>2</sub>-OH in DMSO:Postbiotics (ProRenew Complex) in specific concentrations.
